# Supplementary material for: Unique protonconduction 3D ZnII metal organic framework exposure to aquaammonia vapor to enhance conductivity
Source: Royal Society of Chemistry journal article supplement (doi:10.1039/d2nj00444e), 2022-01-01
Supplement: d2nj00444e1.pdf [file d2nj00444e1.pdf]

# Unique protonconduction 3D ZnII metal organic frameworks exposure to aquaammonia vapor for enhancing conductivity

Ruilan Liu<sup>a</sup>, Jie Li<sup>a</sup>, Wenping Zhu<sup>a</sup>, Weijie Yang<sup>a</sup>, Yanxia Li<sup>a</sup>, Zengchen Liu<sup>a</sup>, Yahong Chen<sup>a,c,\*</sup> and Gang Li<sup>b,\*</sup>

<sup>a</sup>*School of Chemistry & Chemical Engineering, Zhoukou Normal University, Zhoukou, 466001, Henan, China. E-mail: lrlgood@163.com*

<sup>b</sup>*College of Chemistry and Green Catalysis Center, Zhengzhou University, Zhengzhou 450001, Henan, China*

<sup>c</sup>*Institute of Medicinal Development and Application for Aquatic Disease Control, Zhoukou Normal University, Zhoukou 466001, China*

## Supporting information

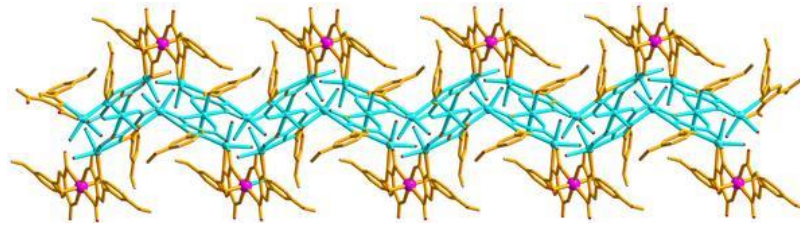

Fig. S1 The one-dimensional chain of ZS-1.

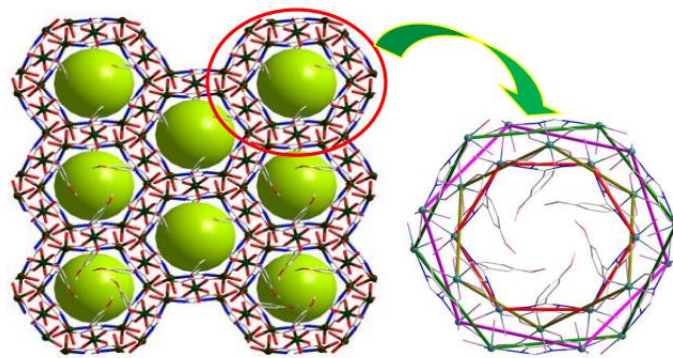

Fig. S2 The three-dimensional network structure of ZS-1.

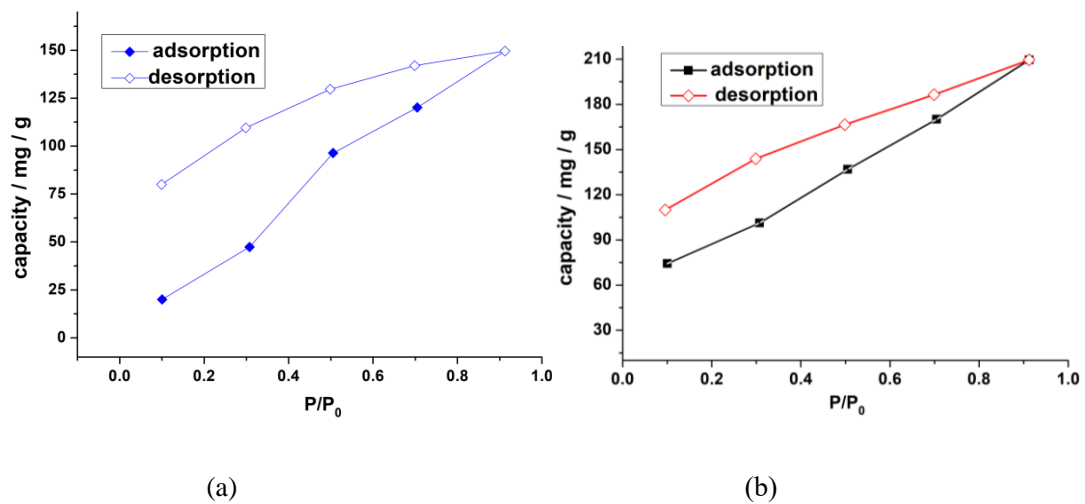

Fig. S3 Water and ammonia vapors vapor adsorption/desorption isotherms of ZS-1 at 25 °C.

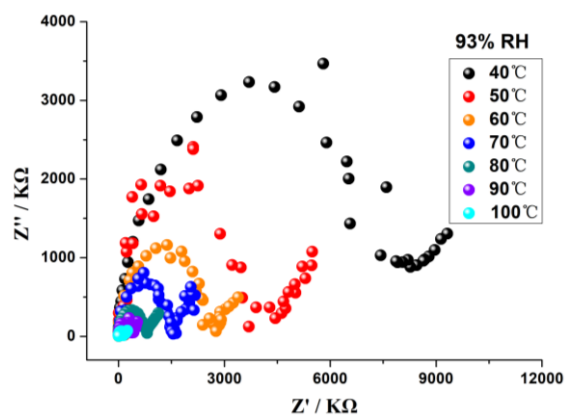

Fig. S4 Nyquist plots of ZS-1 from 40 to 100 °C at 93% RH.

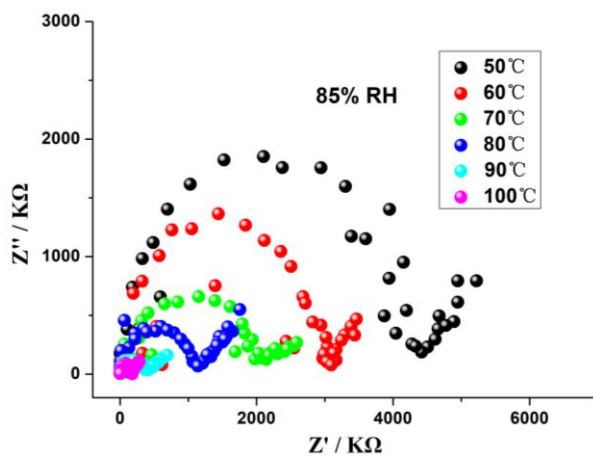

Fig. S5 Nyquist plots of ZS-1 from 50 to 100 °C at 85% RH.

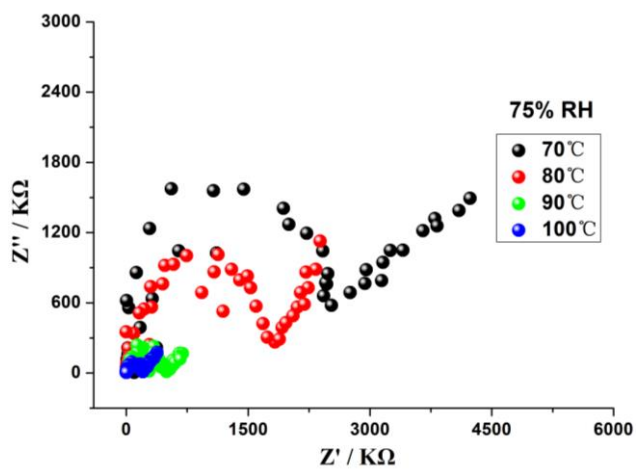

Fig. S6 Nyquist plots of ZS-1 from 70 to 100 °C at 75% RH.

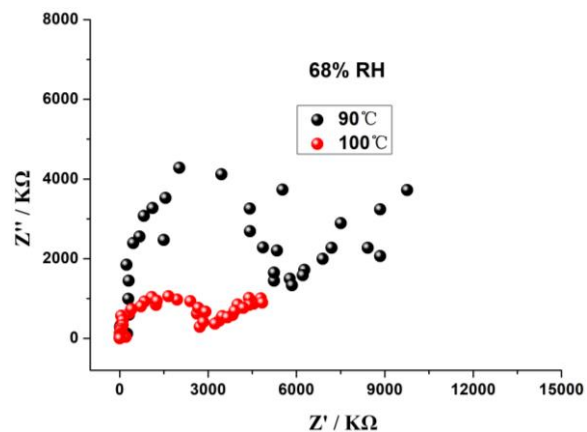

Fig. S7 Nyquist plots of ZS-1 from 90 to 100 °C at 68% RH

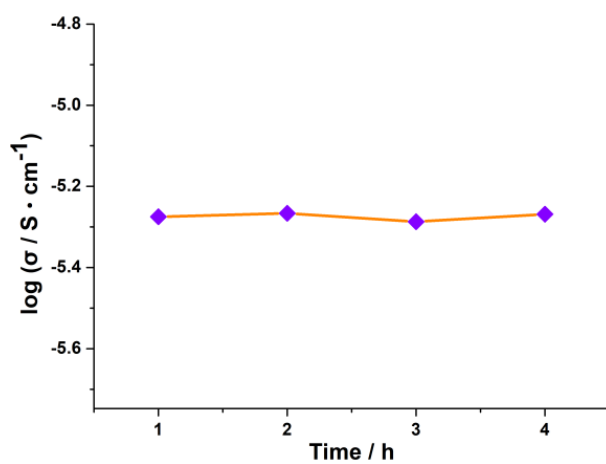

Fig. S8 Proton conductivity of ZS-1 measured at 100 °C-98% RH.

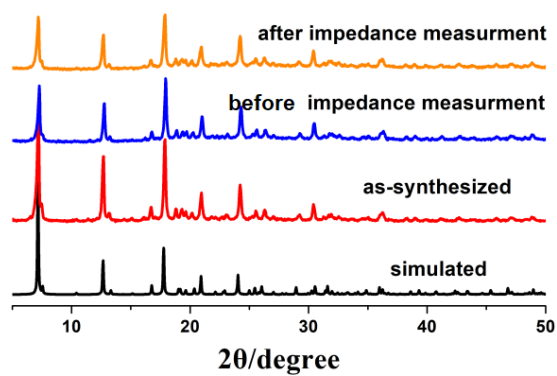

Fig. S9 XRD patterns of ZS-1 before and after proton conductivity measurement.

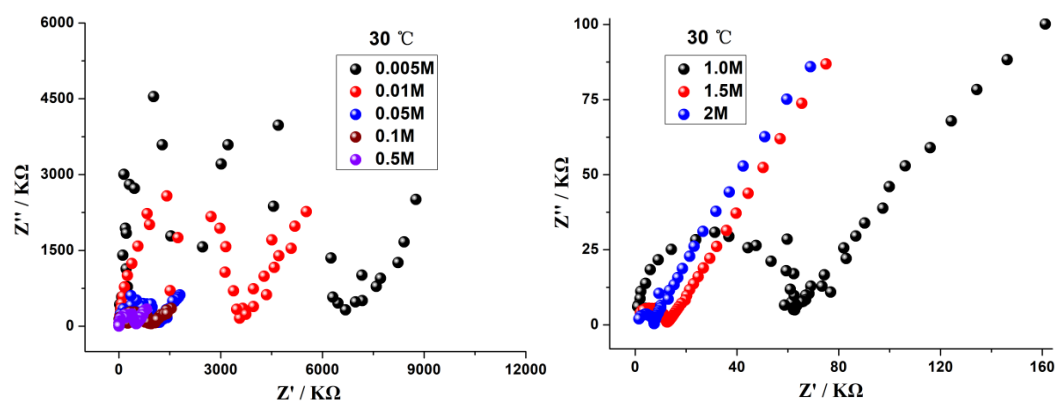

Fig. S10 Impedance spectra of ZS-1 at 0.005-2.0 M-30 °C.

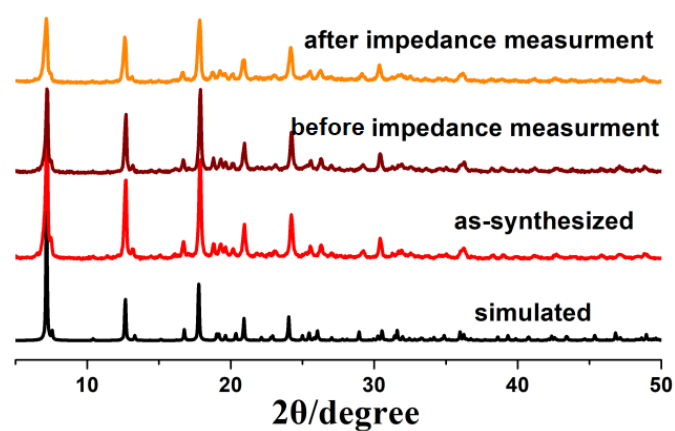

Fig. S11 XRD patterns of ZS-1 before and after proton conductivity measurement.

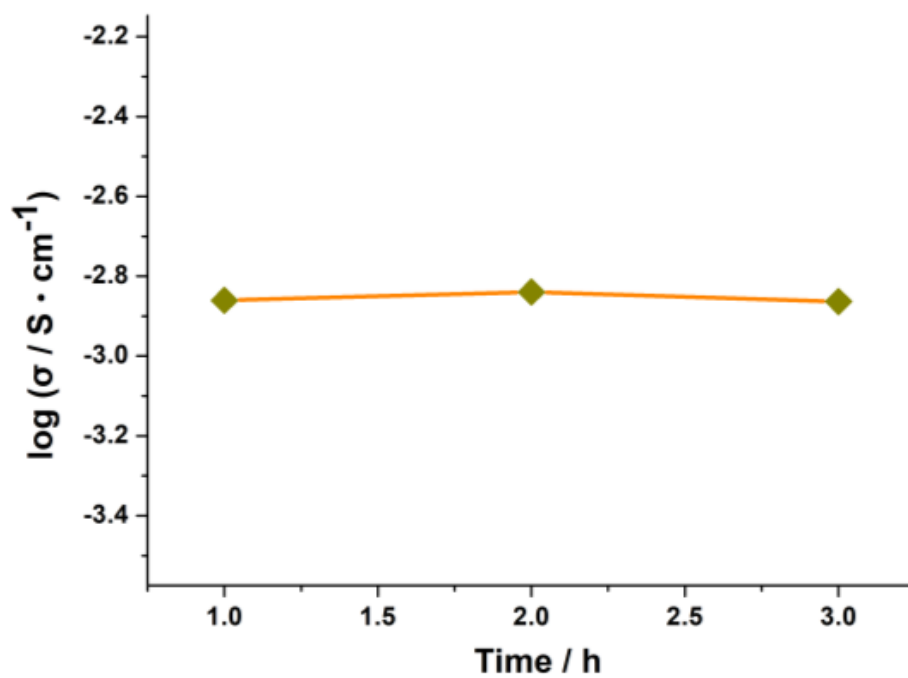

Fig. S12 The time persistence of ZS-1 at 100 °C-2 M aquaammonia vapor.
